1 **Title page**

2

3 **Physiological Effects of Exercising at Different Intensities Wearing TNT or Double-layer Cotton**

4 **Facemasks Compared to Not Wearing a Mask**

5

6 Fabrício Braga<sup>1,2</sup>; Gabriel Espinosa<sup>1</sup>; Amanda Monteiro<sup>1</sup>; Beatriz Marinho<sup>1</sup>; Eduardo Drummond<sup>1</sup>

7

8 **Affiliations**

9 <sup>1</sup> Human Performance Laboratory; Rio de Janeiro; Brazil

10 <sup>2</sup> Casa de Saúde São José; Rio de Janeiro; Brazil

11

12 **Corresponding author:** Fabrício Braga

13 Laboratório de Performance Humana, Largo do Ibam, n01 - 2º andar - Humaitá, Rio de Janeiro - RJ,

14 Brazil ZIP code: 22271-070

15 email: [fabricao.braga@instutodoesporte.com](mailto:fabricao.braga@instutodoesporte.com)

16 ORCID ID: Fabrício Braga: 0000-0002-7062-1705

17

18

19 **Abstract**

20 We compared the physiological differences between exercising wearing a TNT or a double-layer-cotton  
21 (DLC) facemask (FM) and not wearing a mask (NM). Sixteen volunteers underwent 4 sets (S) of 2  
22 sequential bouts (B). B1 and B2 corresponded to light and moderate intensity cycling, respectively. FMs  
23 were used as follows: S1: NM; S2: TNT or DLC; S3: DLC or TNT; and S4: NM. Metabolic, pulmonary,  
24 and perceptual variables were collected. The main results are expressed as effect sizes and confidence  
25 intervals (ES [95% CI]) for TNT and DLC unless otherwise indicated. Compared to NM, FM increased  
26 the duty cycle (B1=1.11[0.58-1.61] and 1.53[0.81-2.18]; B2=1.27[0.63-1.84] and 1.93[0.97-2.68]) and  
27 decreased breath frequency (B1=0.59[0.23-0.94] and 1.43[0.79-2.07], B2=0.39[0.05-0.71] and 1.33[0.71-  
28 1.94]). Only B1 tidal volume increased (0.33[0.09-0.56] and 0.62[0.18-1.05]) enough to avoid a  
29 ventilation reduction with TNT but not with DLC (B1=0.52[0.23-0.79]; B2=0.84[0.44-1.22]). Both FMs  
30 reduced oxygen saturation in B1 (0.56 [0.07-1.03] and 0.69 [0.09-1.28]) but only DLC did so in B2 (0.66  
31 [0.11-1.13]). Both end tidal CO<sub>2</sub> (B1=0.23[0.05-0.4] and 0.71[0.38-1.02]; B2=0.56[0.2-0.9] and  
32 1.20[0.65-1.68]) and mixed-expired-CO<sub>2</sub> (B1=0.74[0.38-1.08] 1.71[1.03-2.37], B2=0.94[0.45-1.38] and  
33 1.78[0.97-2.42]) increased with FMs. Ventilatory adaptations imposed during FM exercising influenced  
34 blood-lung gas exchange. Larger ESs were seen with DLC. No adverse changes to human health were  
35 observed.

36

37

38 **Novelty Bullets**

- 39 • Facemasks affect the breathing pattern by changing the frequency and amplitude of pulmonary  
40 ventilation.
- 41 • The augmented ventilatory work increases VO<sub>2</sub>, VCO<sub>2</sub>, and RPE and promotes non-concerning  
42 drops in SpO<sub>2</sub> and CO<sub>2</sub> retention.
- 43 • Increased inspiratory and expiratory pressure can account for the reduction in pulmonary  
44 physiological dead space.

45

46 **Keywords:** facemask, COVID-19, exercise, hypercapnia, hypoxemia

47

48

## 49 **Introduction**

50 The SARS-CoV-2 pandemic triggered many events and circumstances that deeply affect everyday life,  
51 demanding adaptations (Haleem et al. 2020). One of them is universal facemask (FM) use to decrease  
52 environmental viral airborne community transmission (Setti et al. 2020; Esposito et al. 2020). These  
53 recommendations include exercise practice, either outdoors or in indoor facilities. The efficacy of FM use  
54 to reduce the odds of respiratory tract viral infection in high-risk situations has already been widely  
55 demonstrated in the household set. However, its benefit in mitigating contagion is strongly dependent on  
56 adherence and early use regarding symptom onset in the index case (Cowling et al. 2009; MacIntyre et al.  
57 2015). Despite limited evidence, observational studies suggest a potential benefit of FM use in containing  
58 virus spread (Cheng et al. 2020; Eikenberry et al. 2020). Some experts also endorse FM use (MacIntyre  
59 and Chughtai 2015; Fodjo et al. 2020; Wang et al. 2020).

60 In this scenario, the safety of wearing a FM while exercising has been the subject of debate, and concerns  
61 have been raised by the popular media. Nevertheless, the paucity of scientific research approaching this  
62 problem so far has amplified the buzz and divided opinions (Chandrasekaran and Fernandes 2020). Those  
63 who advocate against wearing FMs raise the possibility of dangerous CO<sub>2</sub> retention and O<sub>2</sub> desaturation.  
64 Before the SARS-CoV-2 pandemic, an investigation of the physiological effect of wearing a FM during  
65 physical activity focused on personal protective equipment such as filtering air-purifying facepiece  
66 respirators (Johnson et al. 1995; Johnson 2016). Those few studies have shown some increases in exhaled  
67 CO<sub>2</sub> and the opposite effect on O<sub>2</sub>, as well as a reduction in exercise performance. The proposed  
68 mechanism was not an increase in pulmonary dead space but a reduction in alveolar ventilation caused by  
69 the higher ventilation resistance. A similar effect was seen among healthcare workers using N95  
70 respirators (Özdemir et al. 2020). However, most of the issues with acceptability of these FMs seems to  
71 be related to the thermal sensation, rather than to any ventilatory disturbance they may cause (Nielsen et  
72 al. 1987).

73 Suggested exercise FMs are non-woven fabric surgical masks (TNT) or double-layer cotton (DLC). Thus,  
74 the physiological effect of their use during exercise is poorly understood.

75 Therefore, the aim of this study was to investigate the physiological effects of wearing TNT and DLC  
76 FMs during exercise at light and moderate intensities. The following physiological variables were  
77 considered: oxygen uptake (VO<sub>2</sub>), carbon dioxide output (VCO<sub>2</sub>), respiratory exchange ratio (RER), heart  
78 rate (H<sub>R</sub>), tidal volume (V<sub>T</sub>), breath frequency (B<sub>f</sub>), minute ventilation (V<sub>E</sub>), end tidal CO<sub>2</sub> pressure

79 ( $E_T\text{CO}_2$ ), mixed-expired  $\text{CO}_2$  ( $\text{PECO}_2$ ), difference between  $E_T\text{CO}_2$  and  $\text{PECO}_2$  ( $\Delta E_T\text{-PECO}_2$ ), oxygen  
80 saturation ( $\text{SpO}_2$ ), relationship between inspiratory time and total ventilatory time (duty cycle [ $T_i/T_{\text{TOT}}$ ]),  
81 rate of perceived effort (RPE), subjective thermal perception (STP) and FM microclimate temperature  
82 (FMMT). We hypothesized that DLC but not TNT increases exhaled  $\text{CO}_2$  compared with NM and that  
83 neither affects  $\text{SpO}_2$ .

84

## 85 **Materials and methods**

### 86 **Participants**

87 This research was conducted at the physiology laboratory, LPH, Rio de Janeiro, Brazil. Sixteen healthy  
88 volunteers (7 women) were recruited among amateur cyclists screened in our sport medicine clinic within  
89 the previous 12 months. The inclusion criteria were men or women aged  $\geq 18$  years old who had a normal  
90 health screening within the last 12 months and no chronic comorbidities and were currently cycling at  
91 least 3 times a week either for sport or recreationally. This sample size was determined based on the  
92 calculation described in the statistical section. Participant characteristics are presented in the first section  
93 of Table 1. After providing written informed consent, they submitted to the two-day protocol outlined.  
94 This study was approved by the Ethics Committee of the Hospital Federal de Bonsucesso under protocol  
95 number 33487920.9.0000.5253. All the procedures in this study were in accord with the 1975 Helsinki  
96 Declaration, updated in 2013.

97

### 98 **Procedures**

99 Volunteers were asked to refrain from exercising within 24 hours prior to each visit. At the first visit,  
100 volunteers performed a cardiopulmonary exercise test (CPET) to exhaustion on an electromagnetic-  
101 braked cycle ergometer (Lode Corival®, Groningen, The Netherlands) using an individualized ramp  
102 protocol based on the Wasserman algorithm. Throughout the exercise, gas exchange and ventilatory  
103 variables were continuously measured with a breath-by-breath analyser using a computerized metabolic  
104 cart (Metalyzer 3B®; Cortex®, Leipzig, Germany). Before each test, the gas analysis system underwent a  
105 two-point gas calibration using ambient air and a gas mixture containing 4%  $\text{CO}_2$  and 16%  $\text{O}_2$ . The flow  
106 sensor was calibrated using a 3 L air syringe with a constant flow of 1 L/s. Both procedures were  
107 followed as recommended by the manufacturer. All data were smoothed by the 15-point moving average  
108 method, automatically calculated by analytic software (MetaSoft Studio®; Cortex®, Leipzig, Germany).

109 SpO<sub>2</sub> and H<sub>R</sub> were recorded throughout the exercise using a finger probe Nonin 3150 WristOx-2 (Nonin  
110 Medical Systems, Minnesota, US) and a Polar® H7 (Polar Electro Kempele, Finland) chest strap,  
111 respectively.

112 The CPET protocol consisted of 2 minutes of rest and 3 minutes of unload pedalling followed by a ramp  
113 phase until exhaustion. A fixed comfortable cadence between 65 and 85 rpm was requested, and when the  
114 participant failed to sustain a minimum of 60 rpm for more than 5 seconds despite verbal encouragement,  
115 the test was interrupted. A five-minute passive recovery period followed.

116 First and second ventilatory thresholds (VT1 and VT2, respectively) were estimated based on standard  
117 methodologies previously described (Wasserman et al. 1994; Lucia et al. 2000). Peak values for  
118 physiological variables were defined as the highest 30-s average value.

119 The second visit occurred 1 to 7 days after the first visit. Volunteers performed 4 sets of exercise with a  
120 10-minute rest between them. Each set consisted of two six-minute bouts (B) of constant work exercise  
121 (on the same CPET cycle ergometer) using 80% of the workload at VT1 for B1 and 80% of VT2 for B2.  
122 S1 and S4 were performed with NM. For S2 and S3, a 10 x10 cm snippet of TNT (removed from a  
123 surgical FM) or DLC (provided by a local mask manufacturer) was attached in front of the flow sensor  
124 using a rubber band to cover it completely (figure 2-A, 2-B, 2-D and 2-E). For the first included  
125 volunteer, DLC and TNT were used on S2 and S3, respectively. Thereafter, to reduce the effect of  
126 exercise time on physiological response, this sequence was counterbalanced for the next volunteers. In  
127 order to blind the volunteers from the mask they were using, a cloth frame was placed on the border of the  
128 flow sensor (figure 2-C).

129 Throughout all sets of exercise, VO<sub>2</sub>, VCO<sub>2</sub>, V<sub>T</sub>, B<sub>f</sub>, V<sub>E</sub>, H<sub>R</sub>, SpO<sub>2</sub>, and FMMT were continuously  
130 measured using the same devices previously described. RPE and STP were obtained every minute during  
131 exercise using the Borg CR10 and 9-item thermal sensation scales, respectively (Gagge et al. 1971). A  
132 double sensor air thermometer (TM10, Agetherm®, São Paulo, Brazil) had one probe positioned inside  
133 the examining mask, monitoring FMMT, and the other checking ambient air temperature. Thus, both  
134 temperatures could be simultaneously measured by the same device.

135 Laboratory temperature and relative humidity were maintained at 20.4±3.0°C and 55.5±10.8%,  
136 respectively, with no significant variation throughout the experimental conditions. For more detailed data,  
137 see figure S1 and table S2 in the online supplementary material.

138

139

## 140 **Statistical analysis**

141 Sample size was calculated using G\*power v.3.1 software (G\*power®, Dusseldorf, Germany) based on  
142 repeated measures ANOVA to achieve a power of 80% and a level of significance of 5% (two sided),  
143 with an effect size (ES) of 0.4 and a correlation among measures of 0.6. Therefore, 15 volunteers were  
144 needed.

145 Two last-minute average values from each B were used for analysis for all volunteers but one, who had a  
146 drop in ventilation and oxygen uptake after the fourth minute of B2 wearing the DLC mask. In this case,  
147 values between the second and fourth minutes were considered. NM values were considered as the  
148 average of S1 and S4. To confirm the measure's stability regardless of time, we calculated the intraclass  
149 correlation coefficient (ICC) and its 95% confidence interval (CI) for S1 and S4 based on the absolute  
150 agreement of single measures in a two-way mixed-effects model between conditions (Table S1).

151 The data distribution for each variable was analysed using the Shapiro-Wilk test. Continuous variables  
152 were expressed as the mean  $\pm$  SD or median (IQR) according to their distribution. Parametric variables  
153 were compared by repeated measures ANOVA followed by the Bonferroni test for post hoc pairwise  
154 analysis. Partial eta squared ( $\eta^2$ ) was calculated as the corresponding ES. Nonparametric variables were  
155 compared by Friedman's test followed by Dunn's post hoc analysis for within-group comparisons. ES  
156 was calculated using Kendall's W. Categorical variables were expressed as percentages and compared  
157 with the Chi-square or Fisher's exact test.

158 ESs were measured for pairwise comparison using Hedges' *g*. Nonparametric data were previously  
159 normalized using natural logarithmic before computing ES. The qualitative assessment of the ES was  
160 interpreted as follows (Sawilowsky 2003): <0.2: very small (VSES); 0.2 to 0.49: small (SES); 0.5 to 0.79:  
161 medium (MES), 0.8 to 1.19: large (LES), 1.2 to 1.99 very large (VLES) and  $\geq 2.0$  huge (HES). Common  
162 language ES (CLES) was also measured (McGraw and Wong 1992).

163 Statistical analysis was carried out using the Statistical Package for the Social Sciences software (IBM  
164 SPSS for Windows, version 22.0, IBM Corp., Armonk, NY) and R Studio (RStudio® Team, 2020,  
165 Vienna, Austria).

166

## 167 **Results**

168 Of the 16 selected volunteers, two failed to complete B2 on the DLC set. In both cases, shortness of  
169 breath was the reason for stopping the exercise. Immediately after removing the FM, symptoms ceased,  
170 and both were able to continue the study protocol. No other clinical event occurred during the experiment.  
171 Therefore, for B2 comparisons, 14 volunteers were considered. The results (ES with 95%CI) for pairwise  
172 comparisons between FM are reported in Table 2. CLES is presented in Table S3 in the online material.  
173 Figure 3 shows the boxplot results for each variable. A detailed description follows below.

174

175 **Oxygen uptake and carbon dioxide output, respiratory exchange rate and heart rate.**

176  $VO_2$  was significantly different between FMs during B1 and B2 (figure 3-a), increasing 8.7 and 10.4%  
177 during B1 and 6.8 and 6.3% during B2 for TNT and DLC, respectively (SES for all). No difference was  
178 found between TNT and DLC during either bout.  $VCO_2$  was also different between FMs (figure 3-b).  
179 Compared to NM,  $VCO_2$  increased 8.7 (SES) and 7.3% (SES) during B1 and 4.8 (VSES) and 1.9% (non-  
180 significant ES) during B2 for TNT and DLC, respectively. RER (figure 3-c) was significantly different  
181 between FMs but in the opposite direction observed for  $VO_2$  and  $VCO_2$ , showing a non-proportional  
182 change between these variables. RER was 3.1 (LES) and 5.7% (VLES) lower during B1 and 1.9 (MES)  
183 and 4.3% (VLES) lower during B2 for TNT and DLC, respectively, than for NM. TNT RER was 2.7%  
184 (MES) lower than DLC during B1, and no difference was found between them during B2.  
185  $H_R$  (figure 3-d) did not differ between FMs during B1. However, during B2, despite the 2.2%  $H_R$  increase  
186 with DLC compared to NM in the post hoc analysis, no significant difference was found for any  
187 comparison.

188

189 **Tidal volume, breathing frequency, minute ventilation, duty cycle, and oxygen saturation.**

190  $V_T$  (figure 3-e) was different between FMs during B1 but not B2. There was a 7.4 (SES) and 15.4%  
191 (MES) increase in  $V_T$  for TNT and DLC, respectively, compared to NM. Both FMs significantly reduced  
192  $B_f$  (figure 3-f) during B1 and B2. During B1,  $B_f$  was 9.6 (MES) and 23.6% (VLES) lower with TNT and  
193 DLC, respectively, than with NM. Moreover, TNT  $B_f$  was 15.5% (LES) lower than DLC  $B_f$ . During B2,  
194 no difference was found between NM and TNT, but DLC promoted 20.2 (VLES) and 14.9% (LES)  
195 reductions in  $B_f$  compared to NM and TNT, respectively. The net effect on  $V_E$  (a product of  $B_f$  and  $V_T$ -  
196 figure 3-g) also showed significant differences between FM and NM exercise. However,  $V_E$  was not

197 different between NM and TNT during B1 or B2. Otherwise, DLC reduced  $V_E$  by 12.0 (MES) and 9.8%  
198 (SES) during B1 and 17.9 (LES) and 14.2% (MES) during B2 compared to NM and TNT, respectively.  
199  $T_i/T_{TOT}$  (figure 3-h) was different among FMs during both B1 and B2. Post hoc analysis shows 6.1 (LES)  
200 and 10.4% (VLES) lower values of  $T_i/T_{TOT}$  for NM than for TNT and DLC, and no differences between  
201 TNT and DLC during B1. During B2,  $T_i/T_{TOT}$  with NM was 5.1 and 9.8% (VLES for both) lower than  
202 that with TNT and DLC, respectively. This time, the TNT value was 4.5% (MES) lower than that of the  
203 DLC.  $SpO_2$  (figure 3-i) was different between FMs during B1 and B2, but post hoc analysis was unable to  
204 show significant differences within FM comparisons. However, ES showed significant differences for  
205 pairwise analysis. DLC and TNT showed an MES reduction in  $SpO_2$  compared to NM during B1. An  
206 MES was seen during B2 for DLC relative to TNT and NM. All other comparisons were not significant.

207

#### 208 **Mixed-expired and end tidal $CO_2$ pressures.**

209  $E_TCO_2$  (figure 3-j) was different between FMs for both B1 and B2. All within-FM post hoc comparisons  
210 were significant; 2.2 (SES), 7.8 (MES) and 4.8% (MES) larger values during B1, as well as 5.2 (MES),  
211 12.8 (LES) and 7.3% (MES) during B2, for NM vs. TNT, NM vs. DLC and TNT vs. DLC, respectively.  
212  $PECO_2$  (figure 3-k) showed behaviour similar to  $E_TCO_2$ , except there was no difference between TNT and  
213 DLC FM in B1 post hoc analysis. However, all ES were significant: 7.5 (MES), 17.7 (MES) and 9.5%  
214 during B1, and 9.5 (MES), 22.2 (LES) and 11.7% (MES) for NM vs. TNT, NM vs. DLC and TNT vs.  
215 DLC, respectively. The difference between  $E_TCO_2$  and  $PECO_2$  ( $\Delta E_T-PECO_2$ , figure 3-l) was markedly  
216 reduced with both FMs at the two exercise intensities. A 16.6 (VLES) and 30.2% (HES) reduction in  
217  $\Delta E_T-PECO_2$  were observed for TNT and DLC, respectively, compared to NM at B1. Moreover, DLC  
218 promoted a 16.3% (LES) increase in  $\Delta E_T-PECO_2$  compared to TNT.

219

#### 220 **Rate of perceived effort, subjective thermal perception, and facemask microclimate temperature**

221 RPE (figure 3-m) increased with FM during B1 and B2. TNT increased RPE by 19.6 (MES) and 15.3%  
222 (MES) during B1 and B2, respectively, as DLC increased by 28.0% (MES) and 33.4% (LES) during B1  
223 and B2, respectively, compared to NM. DLC also increased RPE over TNT during B1: 7.1% (MES).  
224 ANOVA showed significant differences between FMs during B1 but not B2 for STP (figure 3-n).  
225 However, no significant pairwise ES was observed during B1 or B2.



226 FMMT (figure 3-o) showed remarkably similar results during B1 and B2. Post hoc analysis showed 4.9  
227 and 2.1% increases in FMMT with DLC compared to NM and TNT, respectively. ES showed  
228 significance for all comparisons; lower MES, VLES and MES values were observed for NM vs. TNT,  
229 NM vs., and TNT vs DLC, respectively. Likewise, during B2, DLC showed a 4.9 and 2.1% higher  
230 FMMT than NM and TNT, respectively. ES was significant for all 3 comparisons: LES, MES and LES  
231 for NM vs. TNT, TNT vs. DLC and NM vs. DLC, respectively.

## 232 **Discussion**

233 The aim of this study was to investigate the effect of wearing TNT and DLC FMs during exercise at light  
234 and moderate intensities on physiological responses in order to identify potential reasons for reported  
235 malaise and reduced exercise performance, as well as any reason for concern regarding harmful effects on  
236 gas exchange. To our knowledge, this is the first study considering different individualized exercise  
237 intensities.

238 With regard to metabolic variables, both  $\text{VO}_2$  and  $\text{VCO}_2$  exhibited small increases with FM at the two  
239 tested exercise intensities. The effects on  $\text{VO}_2$  were larger than those on  $\text{VCO}_2$ , as illustrated by a  
240 reduction in RER. The absence of excess  $\text{CO}_2$  indicates an increase mainly in aerobic rather than  
241 anaerobic muscle metabolism. DLC produced a MES negative effect on RER that was twofold higher  
242 than the effect of TNT compared to NM. What is the reason for this increase in aerobic metabolism? As  
243 this phenomenon could be observed at higher exercise intensity (80% of  $\text{VT}_2$ ), it is unlikely that an  
244 increase in energy demand on exercising muscles near the ventilatory compensation point did not  
245 generate an excess of  $\text{CO}_2$ . Therefore, we believe that another group of working muscles should have  
246 accounted for the higher  $\text{VO}_2$  fostered by FMs.

247 Among all physiological changes produced by FMs, ventilatory variables were the most affected. The  
248 upper airway obstruction (UAO) imposed by FMs primarily changes the  $T_i/T_{\text{TOT}}$  as a mechanism to  
249 increase inspiratory time and preserve  $V_E$ , as seen in other UAOs (Schneider et al. 2009). Usually,  $T_i/T_{\text{TOT}}$   
250 is constant throughout exercise intensities (Neder et al. 2003). To keep enough expiration time and avoid  
251 dynamic hyperinflation,  $B_f$  was reduced significantly with both FMs, even at low exercise intensity. In an  
252 incremental exercise model, a previous publication reported ventilatory changes with loaded breathing  
253 after 65% peak  $\text{VO}_2$  (D'Urzo et al. 1987). As DLC elicits a higher UAO than TNT, its ventilatory effects  
254 were larger. Wider breathing amplitude to increase  $V_T$  was another mechanism adopted to maintain  $V_E$ ;  
255 however, this response was observed only at lower intensity and not at higher intensity. This happened

256 because  $V_T$  augmentation is restricted by lung and chest wall compliance, so it is a limited manoeuvre to  
257 offset  $B_T$  reduction. Thus, the net effect was a  $V_E$  reduction for DLC at both intensities over NM and TNT.  
258 The TNT FM flow restriction was not enough to reduce  $V_E$  despite its impact on the frequency and time  
259 components of ventilation.

260 There is a negative relationship between the duty cycle ( $T_i/T_{TOT}$ ) and diaphragmatic blood flow (Buchler  
261 et al. 1985) and probably also between muscle performance and oxygen uptake. As muscle activation was  
262 not measured, we hypothesized that efforts to keep  $V_E$  should be attributed to accessory respiratory  
263 muscles, which can also be an explanation for the increased  $VO_2$  observed with FM. Another possible  
264 contribution is active expiration as a result of the shorter expiratory time.

265 General concerns regarding the effects of FM use during exercise rely on their effect on gas exchange. In  
266 this research, FM promoted some reduction over NM on  $SpO_2$  at lower exercise intensity, but only DLC  
267 maintained this effect at a higher intensity. Reduced  $V_E$  is the main reason for dropping  $SpO_2$ . However,  
268 no clinically significant value has been seen ( $SpO_2 < 90\%$ ).

269 Both FMs raised  $ETCO_2$  and  $PECO_2$  values. The effect on  $ETCO_2$  increased with exercise intensity and  
270 was more pronounced with DLC than with TNT. DLC also induced higher values of  $PECO_2$  compared  
271 with TNT, but the effects of both mask types were remarkably similar at both exercise intensities.

272 Moreover, the effect sizes observed for  $PECO_2$  were larger than those for  $ETCO_2$ . As a result,  $\Delta E_T$ -  
273  $PECO_2$  had a sharp decrease with FMs; this decrease was greater for DLC than for TNT and was larger at  
274 lower exercise intensity. Two hypotheses have been proposed to explain the  $CO_2$  exchange shift:  $CO_2$   
275 rebreathing and a reduction in alveolar dead space caused by a continuous positive airway pressure effect  
276 (“CPAP-like effect”) (MacIntyre 2019).

277 Other authors have already reported an increase in exhaled  $CO_2$  values provoked by rebreathing the air  
278 retained by different types of FM either during exercising or resting conditions (Johnson et al. 1995;  
279 Özdemir et al. 2020). However, we could not find any evidence showing that this phenomenon is related  
280 to hypercapnia. In a recent publication about the effects of FM on exercise physiology, researchers  
281 measured arterial gas during incremental exercise and did not report any difference in  $CO_2$  arterial  
282 pressure, even with masks with greater flow restriction, such as the FFP2/N95 (Fikenzer et al. 2020).

283 Unfortunately, the effect on expiratory  $CO_2$  pressures was not mentioned.

284  $\Delta E_T$ - $PECO_2$  is a measure of pulmonary physiological dead space (anatomical plus alveolar) (Hansen et al.  
285 2007). Although it has been reported that alveolar dead space is negligible in healthy adults (Intagliata

286 and Rizzo 2018), loaded respiratory training has been demonstrated to improve ventilatory efficiency  
287 even in the athletic population. Therefore, a reduction in alveolar dead space is a putative mechanism  
288 (Sun et al. 2002; Salazar-Martínez et al. 2018). Furthermore, higher pulmonary perfusion could be  
289 elicited by lower (more negative) intrathoracic pressure generated by FM ventilation, enhancing CO<sub>2</sub>  
290 exchange and decreasing  $\Delta E_T$ -PECO<sub>2</sub> (Skytjoti et al. 2018).

291 The flow chart presented in figure 4 illustrates the findings of this study and the hypothesized underlying  
292 mechanisms. The scheme describes an integrative exercise physiology while masking during low and  
293 high intensity.

294 Regarding safety, in addition to not assuming that increased exhaled CO<sub>2</sub> is a hallmark of hypercapnia,  
295 values often observed on CPET were seen during FM exercise (Bussotti et al. 2008). Both FMs raised  
296 RPE, probably reflecting a combination of ventilatory, VO<sub>2</sub> and H<sub>R</sub> effects. Interestingly, STP, which was  
297 previously reported as an important marker of discomfort caused by FMs related to exercise intensity,  
298 was observed only at lower intensities in this research despite the large effect seen on FMMT. STP had a  
299 large variance among individuals, and this study was probably underpowered to show any difference,  
300 mainly at the higher intensities where two volunteers failed to complete the DLC exercise.

301 Some limitations should be pointed out. First, and in our opinion the most relevant, is external validation.  
302 In real life, a non-negligible amount of the ventilatory flow, either with TNT or DLC, does not pass  
303 through the FM and flows by their borders otherwise. Thus, our FM exercising model was more  
304 obstructive, and changes should probably not be this large in practice. However, as physiological exercise  
305 effects are volume and intensity dependent, we can consider that a similar effect can arise during longer  
306 exercise with less restrictive FM. Second, our population was composed of healthy young people, so we  
307 do not recommend extrapolating these results to older and unhealthy populations. Third, as two  
308 volunteers failed to complete all sets of exercise, the research became underpowered for showing some  
309 post hoc differences at the higher intensity exercise level.

310 Wearing a FM while exercising triggers several physiological adaptations, all of which are more  
311 pronounced with DLC than with TNT. Frequency, amplitude and mostly the time domain of pulmonary  
312 ventilation must suit higher upper airway resistance. This breakdown in the usual breathing pattern  
313 increases VO<sub>2</sub>, H<sub>R</sub> and RPE and promotes a non-concerning drop in SpO<sub>2</sub>. Nevertheless, CO<sub>2</sub> exchange  
314 also adapts. Rebreathing and an increased gas exchange surface elicited by alveolar recruitment are  
315 hypothesized.

316 By reducing heat dissipation, face temperature increased but did not contribute to an increased thermal  
317 sensation, although there was not enough power to assure this lack of effect. Despite these alterations in  
318 regular exercise physiology, no potential harmful effects were reported. Thus, based on local needs and  
319 health authority guidelines, FM wear can be encouraged during exercise as a strategy to contain SARS-  
320 CoV-2 spread.

321

322

323

324 **Acknowledgements:** We thank all volunteers who dedicated their time to collaborating in answering this  
325 scientific question, all staff members of LPH, the Casa de Saúde São José Executive Board for support,  
326 and Ms. Flavio Ricardo Barbosa for continuous efforts in manuscript development.

327

328

329 **Disclosure statement**

330 Conflict of interest: Nothing to declare.

331 Consent for publication: The Author hereby fully consents to publication of this paper in *APNM*.

332 Funding: This work was not supported by any funding.

333 Ethical standards: The Research Ethics Committee of the Hospital Federal de Bonsucesso (Expedient  
334 number: 4.120.822, 29/06/2020) approved the study, which was registered at the National Council of  
335 Research Ethics in accordance with the 1964 Helsinki declaration. Informed consent was obtained from  
336 all participants included in the study.

337

338 **Data availability:** The data that support the findings of this study are available from the corresponding  
339 author upon reasonable request.

340

341 **Abbreviations:**

342 B: Bout

343 B<sub>f</sub>: Breathing frequency

344 CPET: Cardiopulmonary exercise test

345 CI: Confidence interval

|     |                              |                                                         |
|-----|------------------------------|---------------------------------------------------------|
| 346 | DLC:                         | Double-layer cotton                                     |
| 347 | $E_T\text{CO}_2$ :           | End tidal $\text{CO}_2$ pressure                        |
| 348 | ES:                          | Effect size.                                            |
| 349 | $\Delta E_T\text{-PECO}_2$ : | Difference between $E_T\text{CO}_2$ and $\text{PECO}_2$ |
| 350 | FM:                          | Facemask                                                |
| 351 | FMMT:                        | Facemask microclimate temperature                       |
| 352 | $H_R$ :                      | Heart rate                                              |
| 353 | IQR:                         | Interquartile range                                     |
| 354 | NM:                          | No mask                                                 |
| 355 | $\text{PECO}_2$ :            | Mixed-expired $\text{CO}_2$ pressure                    |
| 356 | RER:                         | Respiratory exchange ratio                              |
| 357 | RPE:                         | Rate of perceived effort                                |
| 358 | S:                           | Set                                                     |
| 359 | SD:                          | Standard deviation                                      |
| 360 | $\text{SpO}_2$ :             | Oxygen saturation                                       |
| 361 | STP:                         | Subjective thermal perception                           |
| 362 | $T_i/T_{\text{TOT}}$ :       | Duty cycle                                              |
| 363 | $V_E$ :                      | Minute ventilation                                      |
| 364 | $\text{VCO}_2$ :             | Carbon dioxide output                                   |
| 365 | $\text{VO}_2$ :              | Oxygen uptake                                           |
| 366 | $V_T$ :                      | Tidal volume                                            |
| 367 | VT:                          | Ventilatory threshold                                   |
| 368 |                              |                                                         |
| 369 |                              |                                                         |
| 370 |                              |                                                         |

371 **References**

- 372 Buchler B, Magder S, Roussos C (1985) Effects of contraction frequency and duty cycle on  
373 diaphragmatic blood flow. *J Appl Physiol* 58:265–273. <https://doi.org/10.1152/jappl.1985.58.1.265>
- 374 Bussotti M, Magrì D, Previtali E, et al (2008) End-tidal pressure of CO<sub>2</sub> and exercise performance in  
375 healthy subjects. *Eur J Appl Physiol* 103:727–732. <https://doi.org/10.1007/s00421-008-0773-z>
- 376 Chandrasekaran B, Fernandes S (2020) “Exercise with facemask; Are we handling a devil’s sword?” – A  
377 physiological hypothesis. *Med Hypotheses* 144:110002.  
378 <https://doi.org/10.1016/j.mehy.2020.110002>
- 379 Cheng VCC, Wong SC, Chuang VWM, et al (2020) The role of community-wide wearing of face mask  
380 for control of coronavirus disease 2019 (COVID-19) epidemic due to SARS-CoV-2. *J Infect.*  
381 <https://doi.org/10.1016/j.jinf.2020.04.024>
- 382 Cowling BJ, Chan KH, Fang VJ, et al (2009) Facemasks and hand hygiene to prevent influenza  
383 transmission in households: A cluster randomized trial. *Ann Intern Med* 151:437–446.  
384 <https://doi.org/10.7326/0003-4819-151-7-200910060-00142>
- 385 D’Urzo AD, Chapman KR, Rebeck AS (1987) Effect of inspiratory resistive loading on control of  
386 ventilation during progressive exercise. *J Appl Physiol* 62:134–140.  
387 <https://doi.org/10.1152/jappl.1987.62.1.134>
- 388 Eikenberry SE, Mancuso M, Iboi E, et al (2020) To mask or not to mask: Modeling the potential for face  
389 mask use by the general public to curtail the COVID-19 pandemic. *Infect Dis Model* 5:293–308.  
390 <https://doi.org/10.1016/j.idm.2020.04.001>
- 391 Esposito S, Principi N, Leung CC, Migliori GB (2020) Universal use of face masks for success against  
392 COVID-19: evidence and implications for prevention policies. *Eur. Respir. J.* 55
- 393 Fikenzer S, Uhe T, Lavall D, et al (2020) Effects of surgical and FFP2/N95 face masks on  
394 cardiopulmonary exercise capacity. *Clin Res Cardiol* 1–9. <https://doi.org/10.1007/s00392-020-01704-y>
- 395
- 396 Fodjo JNS, Pengpid S, Villela EF de M, et al (2020) Mass masking as a way to contain COVID-19 and  
397 exit lockdown in low- and middle-income countries. *J Infect.*  
398 <https://doi.org/10.1016/j.jinf.2020.07.015>
- 399 Gage AP, Stolwijk JAJ, Nishi Y (1971) An Effective Temperature Scale Based on a Simple Model of  
400 Human Physiological Regulatory Response

- 401 Haleem A, Javaid M, Vaishya R (2020) Effects of COVID-19 pandemic in daily life. *Curr Med Res Pract*  
402 10:78–79. <https://doi.org/10.1016/j.cmrp.2020.03.011>
- 403 Hansen JE, Ulubay G, Chow BF, et al (2007) Mixed-expired and end-tidal CO<sub>2</sub> distinguish between  
404 ventilation and perfusion defects during exercise testing in patients with lung and heart diseases.  
405 *Chest* 132:977–983. <https://doi.org/10.1378/chest.07-0619>
- 406 Intagliata S, Rizzo A (2018) *Physiology, Lung Dead Space*. StatPearls Publishing
- 407 Johnson AT (2016) Respirator masks protect health but impact performance: A review. *J Biol Eng* 10:1–  
408 12. <https://doi.org/10.1186/s13036-016-0025-4>
- 409 Johnson AT, Dooly CR, Dotson CO (1995) Respirator mask effects on exercise metabolic measures. *Am*  
410 *Ind Hyg Assoc J* 56:467–473. <https://doi.org/10.1080/15428119591016881>
- 411 Lucia A, Hoyos J, Chicharro JL (2000) The slow component of V<sub>O<sub>2</sub></sub> in professional cyclists. *Br J Sports*  
412 *Med* 34:367–374. <https://doi.org/10.1136/bjism.34.5.367>
- 413 MacIntyre CR, Chughtai AA (2015) Facemasks for the prevention of infection in healthcare and  
414 community settings. *BMJ* 350
- 415 MacIntyre CR, Seale H, Dung TC, et al (2015) A cluster randomised trial of cloth masks compared with  
416 medical masks in healthcare workers. *BMJ Open* 5:. <https://doi.org/10.1136/bmjopen-2014-006577>
- 417 MacIntyre NR (2019) Physiologic Effects of Noninvasive Ventilation. *Respir Care* 64:617 LP – 628.  
418 <https://doi.org/10.4187/respcare.06635>
- 419 McGraw KO, Wong SP (1992) A Common Language Effect Size Statistic. *Psychol Bull* 111:361–365.  
420 <https://doi.org/10.1037/0033-2909.111.2.361>
- 421 Neder JA, Dal Corso S, Malaguti C, et al (2003) The pattern and timing of breathing during incremental  
422 exercise: A normative study. *Eur Respir J* 21:530–538.  
423 <https://doi.org/10.1183/09031936.03.00045402>
- 424 Nielsen R, Gwosdow AR, Berglund LG, Dubois AB (1987) The Effect of Temperature and Humidity  
425 Levels in a Protective Mask on User Acceptability During Exercise. *Am Ind Hyg Assoc J* 48:639–  
426 645. <https://doi.org/10.1080/15298668791385336>
- 427 Özdemir L, Azizoğlu M, Yapıcı D (2020) Respirators used by healthcare workers due to the COVID-19  
428 outbreak increase end-tidal carbon dioxide and fractional inspired carbon dioxide pressure. *J. Clin.*  
429 *Anesth.* 66:109901
- 430 Salazar-Martínez E, Matos TR de, Arrans P, et al (2018) Ventilatory efficiency response is unaffected by

431 fitness level, ergometer type, age or body mass index in male athletes. *Biol Sport* 35:393–398.  
432 <https://doi.org/10.5114/biolsport.2018.78060>

433 Sawilowsky SS (2003) A Different Future For Social And Behavioral Science Research. *J Mod Appl Stat*  
434 *Methods* 2:128–132

435 Schneider H, Krishnan V, Pichard LE, et al (2009) Inspiratory duty cycle responses to flow limitation  
436 predict nocturnal hypoventilation. *Eur Respir J* 33:1068–1076.  
437 <https://doi.org/10.1183/09031936.00063008>

438 Setti L, Passarini F, De Gennaro G, et al (2020) Airborne transmission route of covid-19: Why 2 meters/6  
439 feet of inter-personal distance could not be enough. *Int. J. Environ. Res. Public Health* 17

440 Skytjoti M, Søvik S, Elstad M (2018) Respiratory pump maintains cardiac stroke volume during  
441 hypovolemia in young, healthy volunteers. *J Appl Physiol* 124:1319–1325.  
442 <https://doi.org/10.1152/jappphysiol.01009.2017>

443 Sun XG, Hansen JE, Garatachea N, et al (2002) Ventilatory efficiency during exercise in healthy subjects.  
444 *Am J Respir Crit Care Med* 166:1443–1448. <https://doi.org/10.1164/rccm.2202033>

445 Wang J, Pan L, Tang S, et al (2020) Mask use during COVID-19: A risk adjusted strategy. *Environ.*  
446 *Pollut.* 266:115099

447 Wasserman K, Stringer WW, Casaburi RH, et al (1994) Determination of the anaerobic threshold by gas  
448 exchange: biochemical considerations, methodology and physiological effects. undefined

449

450

451



452 **Table 1 – Characteristics of the participant and CPET data.**

453

| <i>Variables</i>                     | <i>Overall</i> | <i>1</i> | <i>2</i> | <i>3</i> | <i>4</i> | <i>5</i> | <i>6</i> | <i>7</i> | <i>8</i> | <i>9</i> | <i>10</i> | <i>11</i> | <i>12</i> | <i>13</i> | <i>14</i> | <i>15</i> | <i>16</i> |
|--------------------------------------|----------------|----------|----------|----------|----------|----------|----------|----------|----------|----------|-----------|-----------|-----------|-----------|-----------|-----------|-----------|
| <i>Demographics</i>                  |                |          |          |          |          |          |          |          |          |          |           |           |           |           |           |           |           |
| <i>Age (years)</i>                   | 35.3±8.9       | 40-44    | 45-49    | 35-39    | 20-24    | 45-49    | 25-29    | 25-29    | 45-49    | 35-39    | 30-34     | 45-49     | 30-34     | 15-19     | 40-44     | 25-29     | 35-39     |
| <i>Sex (% Male)</i>                  | 56.25%         | M        | F        | M        | M        | M        | M        | F        | F        | F        | M         | M         | M         | F         | F         | M         | F         |
| <i>Weight (kg)</i>                   | 72.2±13.2      | 81       | 56.3     | 78.8     | 72.3     | 85       | 60.4     | 61.8     | 58.4     | 65.7     | 80        | 84.4      | 77        | 56.8      | 72.6      | 103.6     | 61        |
| <i>Height (cm)</i>                   | 171.6±8.5      | 178      | 163      | 178      | 171      | 180      | 168      | 156      | 158      | 177      | 173       | 185       | 177       | 170       | 172       | 179       | 161       |
| <i>CPET</i>                          |                |          |          |          |          |          |          |          |          |          |           |           |           |           |           |           |           |
| <i>Peak</i>                          |                |          |          |          |          |          |          |          |          |          |           |           |           |           |           |           |           |
| <i>VO<sub>2</sub>(L/min)</i>         | 3.04±0.76      | 2.93     | 1.94     | 3.68     | 3.98     | 3.36     | 3.51     | 2.47     | 2.68     | 2.17     | 3.31      | 4.46      | 3.24      | 2.84      | 3.08      | 3.82      | 1.67      |
| <i>VO<sub>2</sub>(ml/kg/min)</i>     | 42.6±8.4       | 36.14    | 34.39    | 46.76    | 55.11    | 39.57    | 58.04    | 39.96    | 45.92    | 33.04    | 41.34     | 52.79     | 42.1      | 50.08     | 42.45     | 36.87     | 27.37     |
| <i>%VO<sub>2</sub> previewed</i>     | 125.8±22.1     | 108      | 126      | 126      | 127      | 107      | 131      | 134      | 176      | 115      | 112       | 154       | 102       | 121       | 163       | 113       | 97        |
| <i>Workload (W)</i>                  | 279.3±67.8     | 274      | 189      | 312      | 364      | 299      | 318      | 226      | 248      | 210      | 286       | 413       | 299       | 264       | 284       | 343       | 140       |
| <i>H<sub>R</sub>(bpm)</i>            | 177.8±12.4     | 161      | 179      | 177      | 175      | 159      | 170      | 187      | 169      | 193      | 177       | 174       | 199       | 187       | 195       | 183       | 159       |
| <i>B<sub>f</sub>(irpm)</i>           | 49.9±7.2       | 53       | 44       | 55       | 56       | 37       | 52       | 51       | 45       | 56       | 63        | 52        | 47        | 49        | 58        | 42        | 39        |
| <i>V<sub>T</sub>(L)</i>              | 2.4±0.5        | 2.51     | 1.76     | 3.32     | 2.86     | 3.06     | 2.15     | 1.87     | 2.46     | 2.02     | 2.27      | 3.24      | 2.76      | 2.18      | 1.99      | 3.04      | 1.68      |
| <i>V<sub>E</sub>(L/min)</i>          | 121.8±31.1     | 133.1    | 77.1     | 183.8    | 158.9    | 112.2    | 111      | 94.2     | 110.9    | 113.6    | 142.1     | 168.2     | 128.8     | 106.1     | 115.9     | 127       | 66        |
| <i>ETCO<sub>2</sub>(mmHg)</i>        | 34.5±4.2       | 33       | 33       | 29       | 37       | 38       | 41       | 37       | 32       | 26       | 32        | 36        | 34        | 32        | 38        | 42        | 32        |
| <i>VT2</i>                           |                |          |          |          |          |          |          |          |          |          |           |           |           |           |           |           |           |
| <i>VO<sub>2</sub>(L/min)</i>         | 2.6±0.72       | 2.6      | 1.67     | 2.83     | 3.44     | 3.18     | 3.13     | 2.11     | 1.94     | 1.86     | 2.54      | 3.77      | 2.64      | 2.58      | 2.79      | 3.26      | 1.2       |
| <i>VO<sub>2</sub>(ml/kg/min)</i>     | 35.8±8.3       | 28.41    | 29.66    | 35.93    | 47.62    | 37.42    | 51.84    | 34.1     | 33.26    | 28.38    | 31.78     | 44.65     | 34.25     | 45.47     | 38.37     | 31.46     | 19.64     |
| <i>Workload (W)</i>                  | 217.2±57.7     | 211      | 157      | 226      | 289      | 235      | 273      | 191      | 170      | 161      | 204       | 321       | 217       | 219       | 232       | 280       | 89        |
| <i>H<sub>R</sub>(bpm)</i>            | 159.4±16.9     | 145      | 171      | 140      | 158      | 145      | 159      | 174      | 135      | 182      | 160       | 164       | 169       | 180       | 180       | 162       | 127       |
| <i>B<sub>f</sub>(irpm)</i>           | 32±6.2         | 33       | 31       | 29       | 24       | 31       | 41       | 28       | 28       | 32       | 37        | 39        | 27        | 38        | 44        | 27        | 23        |
| <i>V<sub>T</sub>(L)</i>              | 2.4±0.6        | 2.08     | 1.78     | 3.14     | 3.27     | 2.98     | 2.07     | 2.04     | 2.18     | 1.97     | 2.2       | 2.93      | 2.84      | 2.11      | 1.84      | 2.95      | 1.41      |
| <i>V<sub>E</sub>(L/min)</i>          | 75±18.7        | 69.5     | 54.8     | 91.3     | 79.4     | 90.9     | 85.7     | 57.5     | 61.1     | 63.1     | 82.3      | 114.8     | 77.1      | 79.1      | 81.7      | 79.5      | 32.9      |
| <i>VT1</i>                           |                |          |          |          |          |          |          |          |          |          |           |           |           |           |           |           |           |
| <i>VO<sub>2</sub>(L/min)</i>         | 1.64±0.53      | 1.64     | 0.92     | 1.51     | 2.34     | 1.79     | 2.23     | 1.67     | 1.11     | 1.14     | 1.44      | 2.74      | 1.65      | 1.46      | 1.61      | 2.1       | 0.91      |
| <i>VO<sub>2</sub>(ml/kg/min)</i>     | 22.5±6.6       | 15.72    | 16.32    | 19.18    | 32.35    | 21.04    | 36.98    | 26.99    | 18.95    | 17.3     | 17.97     | 32.49     | 21.43     | 25.65     | 22.2      | 20.26     | 14.85     |
| <i>Workload (W)</i>                  | 115.1±45.5     | 95       | 64       | 89       | 175      | 100      | 180      | 150      | 79       | 76       | 86        | 203       | 115       | 104       | 110       | 165       | 51        |
| <i>H<sub>R</sub>(bpm)</i>            | 121.4±19.1     | 99       | 134      | 85       | 127      | 106      | 128      | 158      | 97       | 138      | 120       | 131       | 114       | 132       | 125       | 143       | 106       |
| <i>B<sub>f</sub>(irpm)</i>           | 23.9±4         | 22       | 19       | 17       | 22       | 21       | 26       | 22       | 23       | 26       | 28        | 31        | 21        | 32        | 25        | 23        | 25        |
| <i>V<sub>T</sub>(L)</i>              | 12.2±42.3      | 1.47     | 1.26     | 1.99     | 2.22     | 1.98     | 1.71     | 1.86     | 1.39     | 1.3      | 1.49      | 2.38      | 1.9       | 1.14      | 1.38      | 1.95      | 0.9       |
| <i>V<sub>E</sub>(L/min)</i>          | 39.1±11.6      | 31.8     | 23.6     | 34.7     | 49.6     | 42.1     | 44.4     | 40.4     | 32.4     | 34       | 41.9      | 72.9      | 39.1      | 36.2      | 35        | 44.3      | 22.8      |
| <i>ETCO<sub>2</sub>(mmHg)</i>        | 40.9±4.7       | 41       | 37       | 42       | 49       | 42       | 50       | 44       | 35       | 37       | 37        | 43        | 39        | 36        | 43        | 45        | 35        |
| <i>Slopes</i>                        |                |          |          |          |          |          |          |          |          |          |           |           |           |           |           |           |           |
| <i>VE/VCO<sub>2</sub> slope</i>      | 26.9±3.6       | 23.8     | 30       | 30.8     | 21       | 28.2     | 25.4     | 25.3     | 29.9     | 31.3     | 30        | 29.6      | 26.4      | 30.5      | 24.7      | 20.3      | 23.4      |
| <i>ΔVO<sub>2</sub>/ΔPower (ml/W)</i> | 8.7±0.8        | 9.2      | 7.8      | 8.9      | 9.9      | 8.6      | 9.5      | 9.2      | 8        | 8.3      | 8.5       | 8.3       | 9.2       | 9.6       | 9.1       | 8.4       | 7         |

454

455

456

457 **Table 2- Effect size values with 95% CIs for pairwise comparisons between masking. VO<sub>2</sub>: Oxygen**  
 458 **uptake, VCO<sub>2</sub>: Carbon dioxide output, H<sub>R</sub>: Heart rate, V<sub>T</sub>: Tidal volume, B<sub>f</sub>: Breathing frequency,**  
 459 **V<sub>E</sub>: Minute ventilation, T<sub>i</sub>/T<sub>TOT</sub>: Duty cycle, E<sub>T</sub>CO<sub>2</sub>: End tidal CO<sub>2</sub> pressure, PECO<sub>2</sub>: Mixed-expired**  
 460 **CO<sub>2</sub> pressure, ΔE<sub>T</sub>-PECO<sub>2</sub>, Difference between E<sub>T</sub>CO<sub>2</sub> and PECO<sub>2</sub>, RPE: Rate of perceived effort,**  
 461 **SpO<sub>2</sub>: Oxygen saturation, STP: subjective thermal perception, FMTP: Facemask microclimate**  
 462 **temperature**

| Variables                          | NM vs. TNT         | TNT vs. DLC        | NM vs. DLC         |
|------------------------------------|--------------------|--------------------|--------------------|
| <b>B1</b>                          |                    |                    |                    |
| VO <sub>2</sub>                    | 0.28[0.16 - 0.4]   | 0.05[-0.08 - 0.19] | 0.34[0.19 - 0.49]  |
| VCO <sub>2</sub>                   | 0.28[0.16 - 0.4]   | 0.04[-0.1 - 0.19]  | 0.24[0.12 - 0.36]  |
| RER                                | 0.83[0.46 - 1.2]   | 0.70[0.34 - 1.04]  | 1.60[0.98 - 2.21]  |
| H <sub>R</sub>                     | 0.30[-0.08 - 0.66] | 0.25[-0.12 - 0.6]  | 0.06[-0.18 - 0.29] |
| V <sub>T</sub>                     | 0.33[0.09 - 0.56]  | 0.33[-0.12 - 0.76] | 0.62[0.18 - 1.05]  |
| B <sub>f</sub>                     | 0.59[0.23 - 0.94]  | 0.87[0.32 - 1.4]   | 1.43[0.79 - 2.07]  |
| V <sub>E</sub>                     | 0.10[-0.03 - 0.22] | 0.43[0.15 - 0.71]  | 0.52[0.23 - 0.79]  |
| T <sub>i</sub> /T <sub>TOT</sub>   | 1.11[0.58 - 1.61]  | 0.63[0.1 - 1.12]   | 1.53[0.81 - 2.18]  |
| SpO <sub>2</sub>                   | 0.56[0.07 - 1.03]  | 0.21[-0.41 - 0.81] | 0.69[0.09 - 1.28]  |
| E <sub>T</sub> CO <sub>2</sub>     | 0.23[0.05 - 0.4]   | 0.50[0.2 - 0.79]   | 0.71[0.38 - 1.02]  |
| PECO <sub>2</sub>                  | 0.74[0.38 - 1.08]  | 0.97[0.46 - 1.46]  | 1.71[1.03 - 2.37]  |
| ΔE <sub>T</sub> -PECO <sub>2</sub> | 1.21[0.72 - 1.69]  | 1.03[0.43 - 1.6]   | 2.44[1.48 - 3.38]  |
| RPE                                | 0.33[0.03 - 0.61]  | 0.12[-0.18 - 0.42] | 0.45[0.07 - 0.81]  |
| FMTP                               | 0.66[0.19 - 1.09]  | 0.67[0.16 - 1.16]  | 1.16[0.45 - 1.84]  |
| STP                                | 0.17[-0.04 - 0.38] | 0.03[-0.23 - 0.29] | 0.20[-0.03 - 0.43] |
| <b>B2</b>                          |                    |                    |                    |
| VO <sub>2</sub>                    | 0.26[0.15 - 0.37]  | 0.02[-0.11 - 0.16] | 0.24[0.07 - 0.41]  |
| VCO <sub>2</sub>                   | 0.18[0.11 - 0.26]  | 0.11[-0.01 - 0.22] | 0.07[-0.02 - 0.17] |
| RER                                | 0.61[0.11 - 1.1]   | 0.80[0.2 - 1.37]   | 1.48[0.61 - 2.31]  |
| H <sub>R</sub>                     | 0.15[0.03 - 0.28]  | 0.02[-0.11 - 0.16] | 0.17[0.03 - 0.3]   |
| V <sub>T</sub>                     | 0.11[-0.04 - 0.27] | 0.07[-0.17 - 0.31] | 0.17[-0.11 - 0.45] |
| B <sub>f</sub>                     | 0.39[0.05 - 0.71]  | 0.87[0.45 - 1.27]  | 1.33[0.71 - 1.94]  |
| V <sub>E</sub>                     | 0.19[0 - 0.38]     | 0.68[0.3 - 1.05]   | 0.84[0.44 - 1.22]  |
| T <sub>i</sub> /T <sub>TOT</sub>   | 1.27[0.63 - 1.84]  | 0.75[0.25 - 1.22]  | 1.93[0.97 - 2.68]  |
| SpO <sub>2</sub>                   | 0.11[-0.19 - 0.41] | 0.58[0.06 - 1.03]  | 0.66[0.11 - 1.13]  |
| E <sub>T</sub> CO <sub>2</sub>     | 0.56[0.2 - 0.9]    | 0.67[0.3 - 1.01]   | 1.20[0.65 - 1.68]  |
| PECO <sub>2</sub>                  | 0.94[0.45 - 1.38]  | 0.92[0.46 - 1.34]  | 1.78[0.97 - 2.42]  |
| ΔE <sub>T</sub> -PECO <sub>2</sub> | 0.77[0.32 - 1.19]  | 0.66[0.29 - 1]     | 1.45[0.69 - 2.12]  |
| RPE                                | 0.45[0.08 - 0.81]  | 0.46[0.14 - 0.77]  | 0.87[0.26 - 1.44]  |
| FMTP                               | 0.87[0.19 - 1.47]  | 0.61[0.02 - 1.14]  | 1.15[0.44 - 1.83]  |
| STP                                | 0.14[-0.04 - 0.3]  | 0.00[-0.17 - 0.17] | 0.12[-0.03 - 0.27] |

463

464

465

466 **Figure 1 – Experimental design**

467

468

469 **Figure 1- Masking preparation procedures**

470

471

472 **Figure 2 – Physiological parameter comparisons between facemasks. The boxplots represent the**  
473 **minimum, maximum, median, first quartile and third quartile in the data set, and the horizontal**  
474 **line reflects the mean of the respective group. Outliers are not represented. Star symbols represent**  
475 **the p values for post-hoc pairwise comparisons: (\*), (\*\*) and (\*\*\*) for  $p < 0.05$ ,  $p < 0.01$  and  $p < 0.001$ ,**  
476 **respectively.  $\text{VO}_2$ : Oxygen uptake,  $\text{VCO}_2$ : Carbon dioxide output,  $\text{HR}$ : Heart rate,  $\text{VT}$ : Tidal**  
477 **volume,  $\text{B}_f$ : Breathing frequency,  $\text{VE}$ : Minute ventilation,  $\text{Ti}/\text{TTOT}$ : Duty cycle,  $\text{ETCO}_2$ : End tidal**  
478  **$\text{CO}_2$  pressure,  $\text{PECO}_2$ : Mixed-expired  $\text{CO}_2$  pressure,  $\Delta\text{E}_\text{T}\text{-PECO}_2$ , Difference between  $\text{E}_\text{T}\text{CO}_2$  and**  
479  **$\text{PECO}_2$ ,  $\text{RPE}$ : Rate of perceived effort,  $\text{SpO}_2$ : Oxygen saturation,  $\text{STP}$ : Subjective thermal**  
480 **perception,  $\text{FMTP}$ : Facemask microclimate temperature.**

481

482

483 **Figure 4 – Integrative exercise physiology while masking, considering all changes detected and**  
484 **hypothesized underlying mechanisms.**

485

# Day<sub>1</sub>

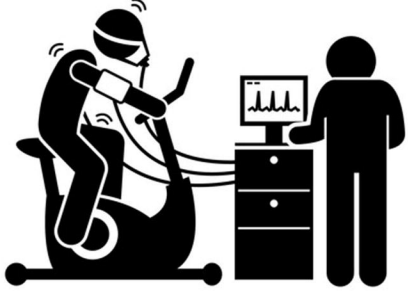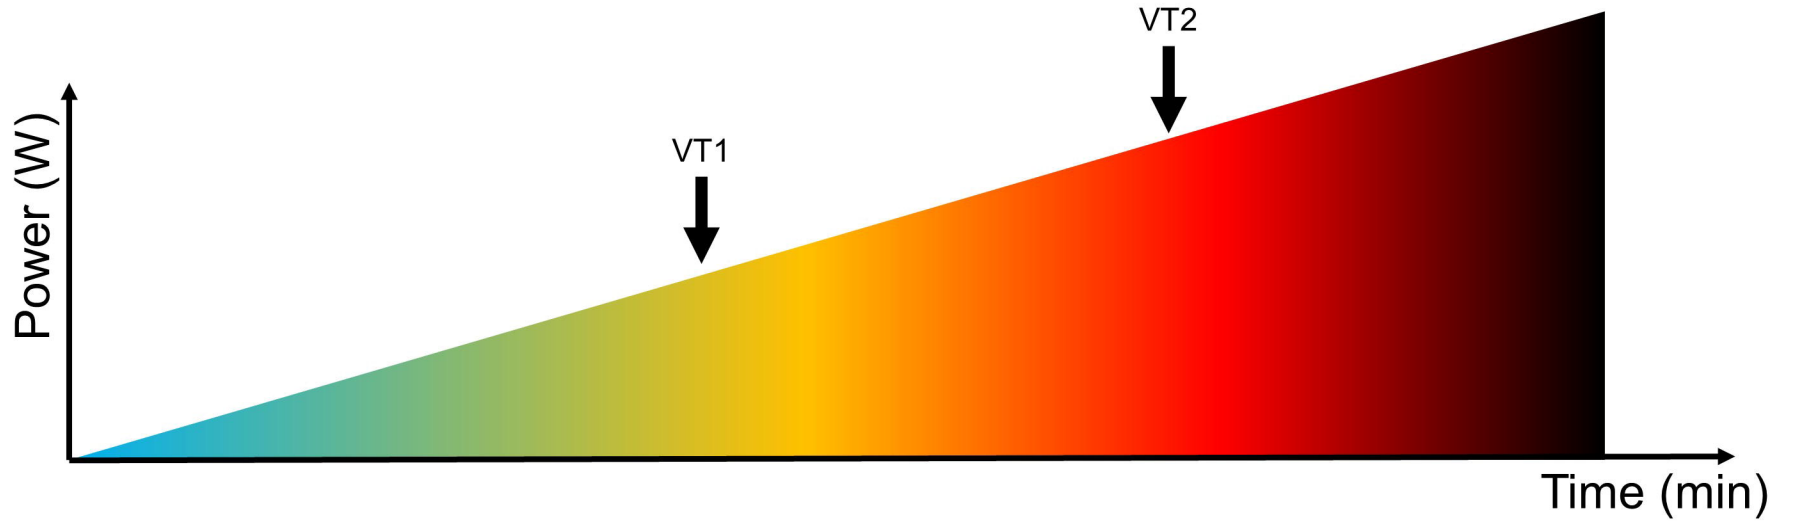

CPET first and second ventilatory threshold corresponding loads were used to determinate day 2 workout

# Day<sub>2</sub>

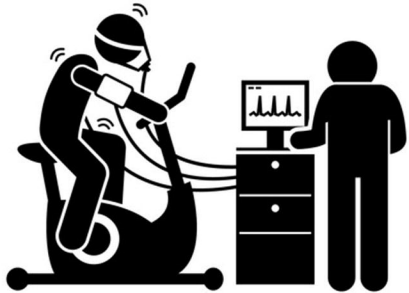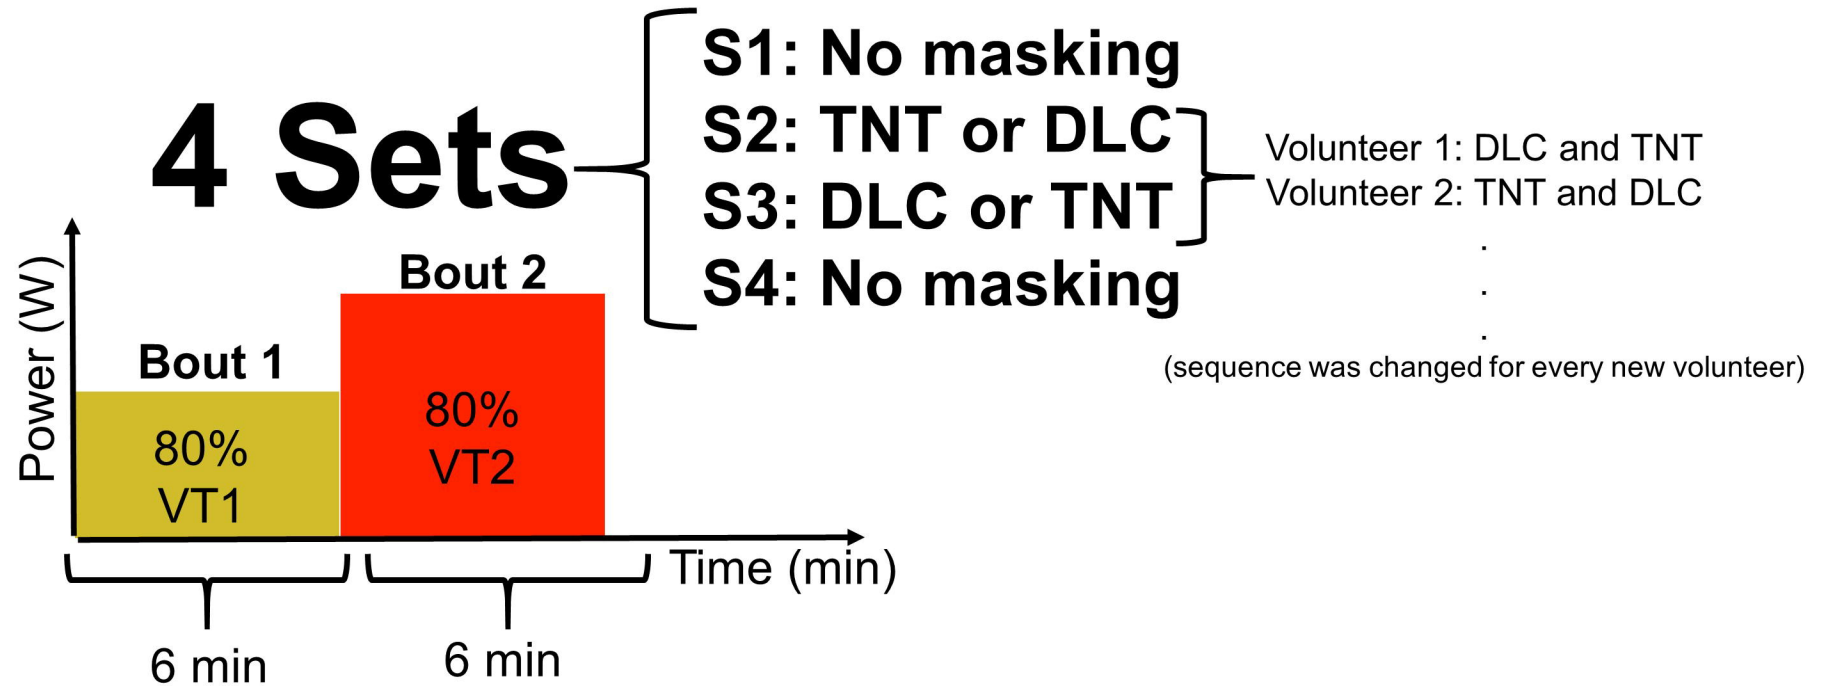

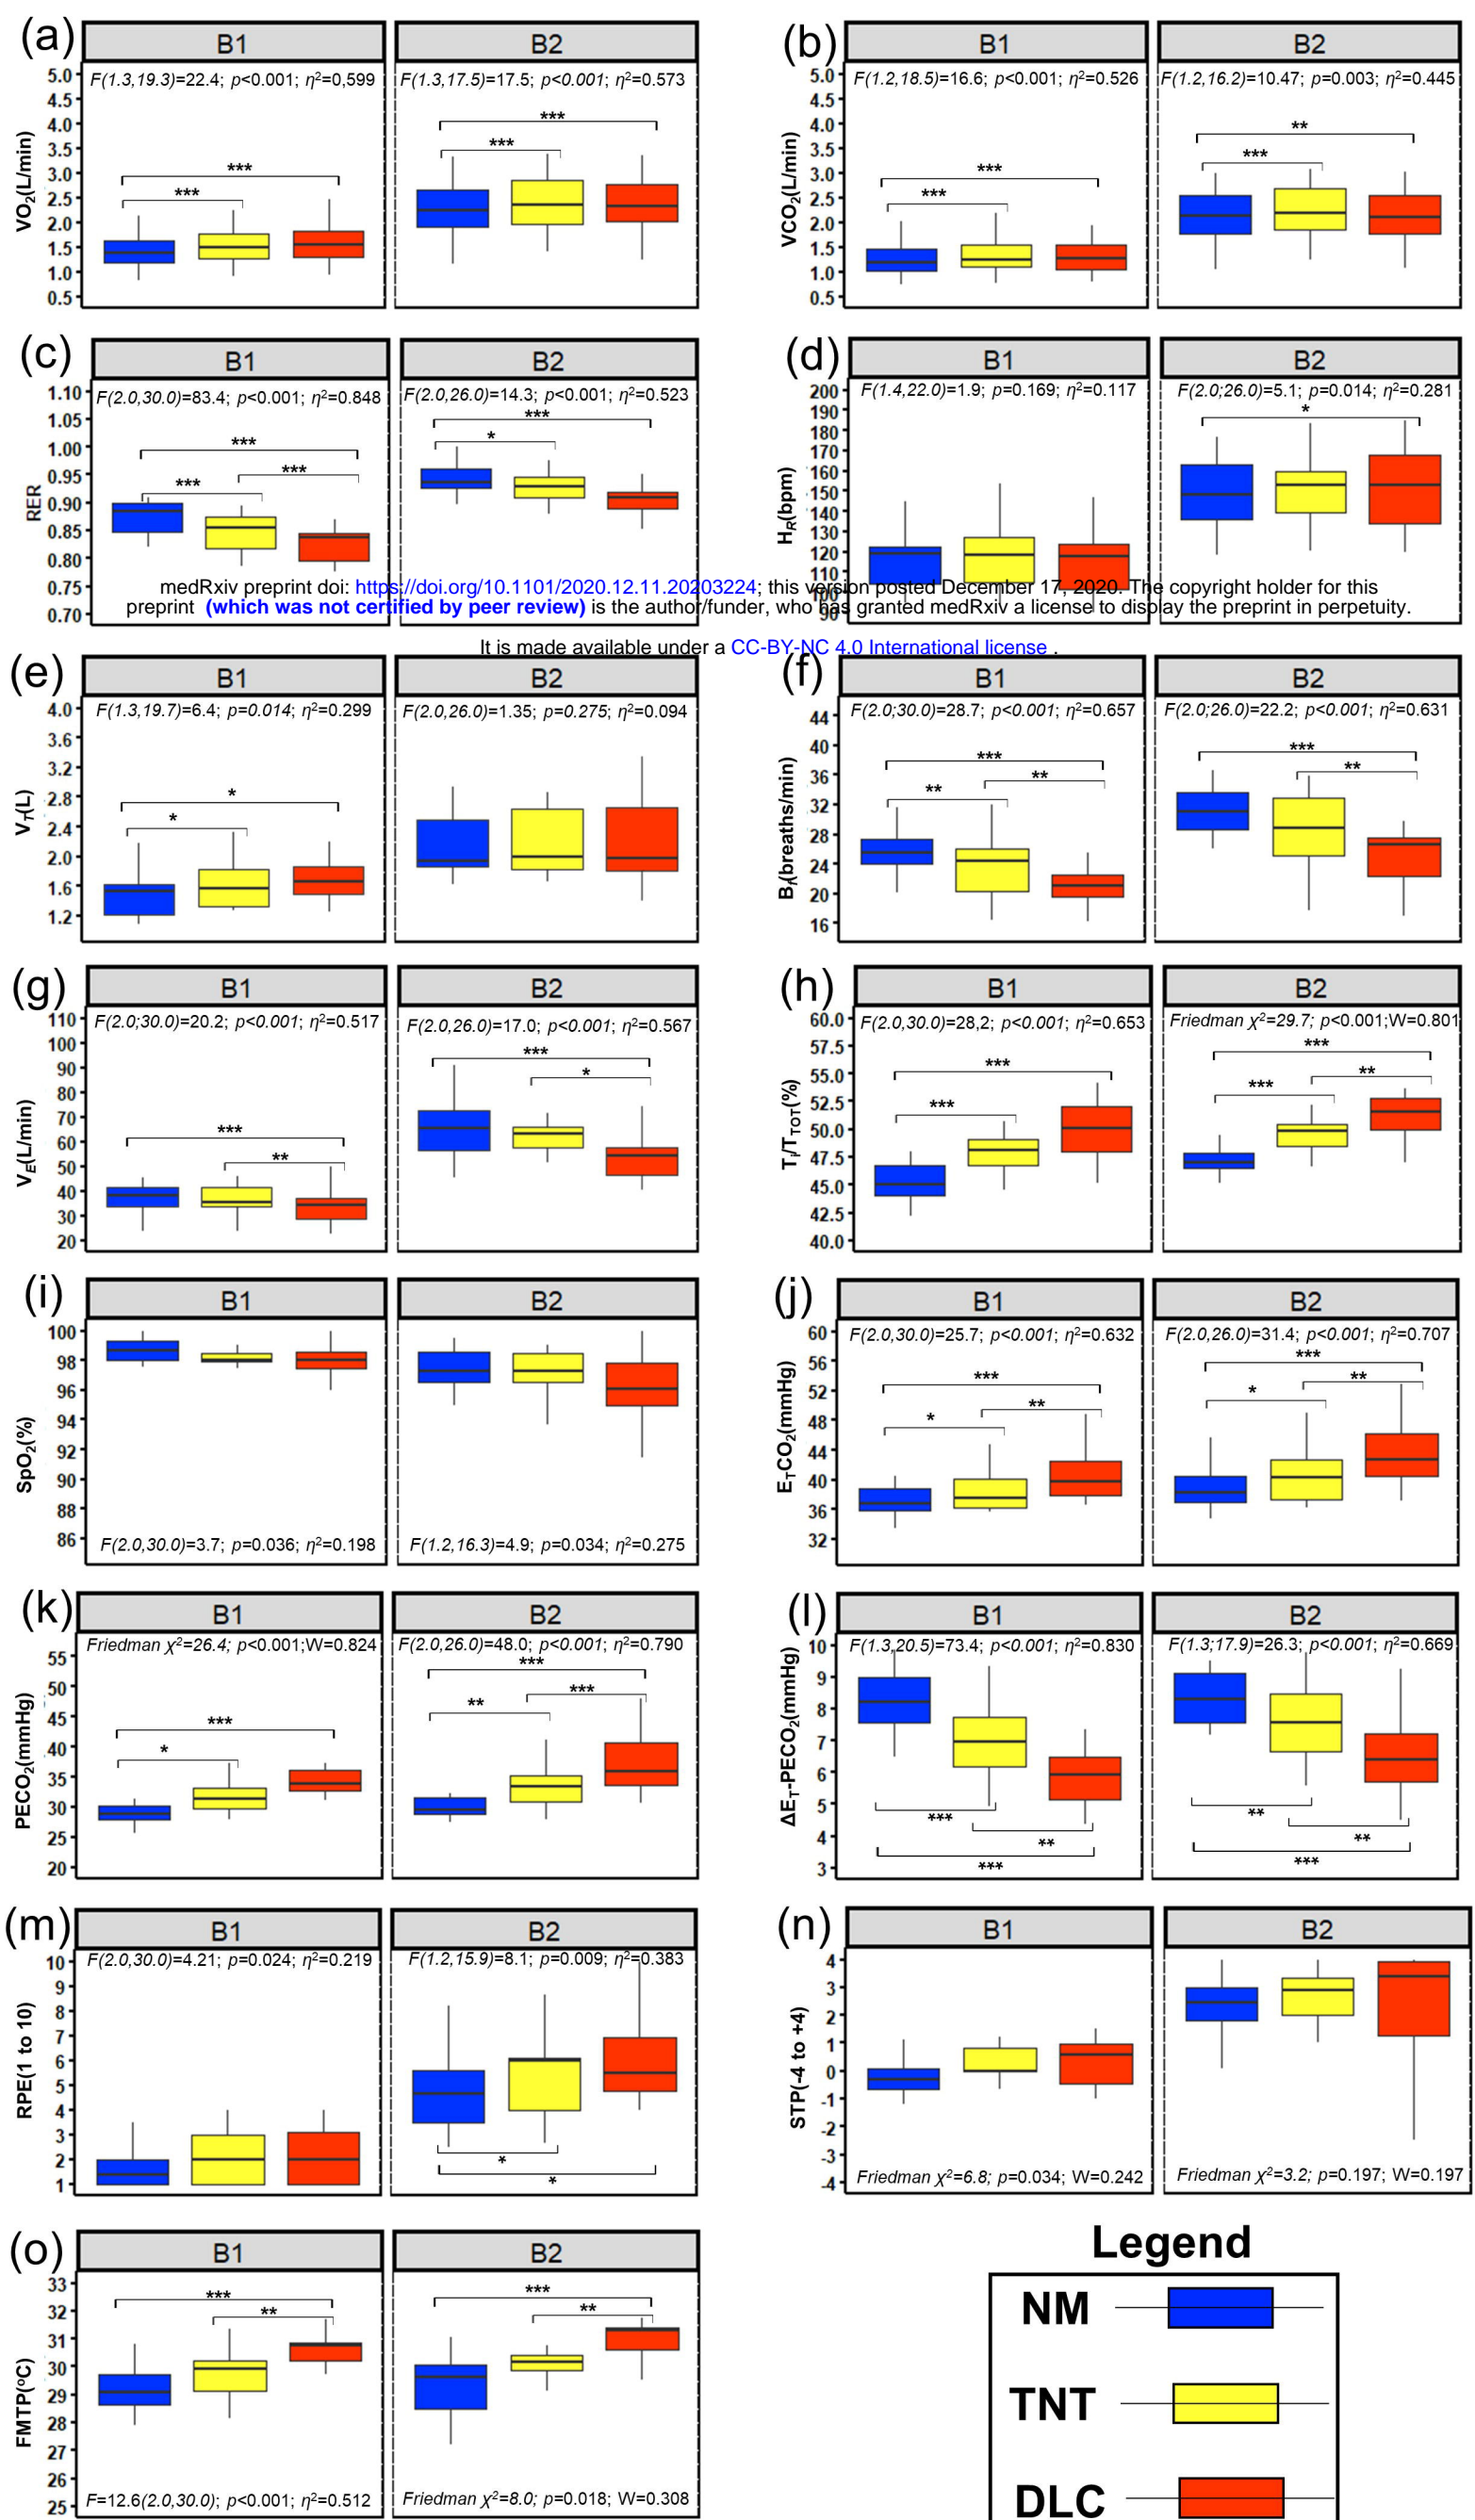

Low to moderate intensity

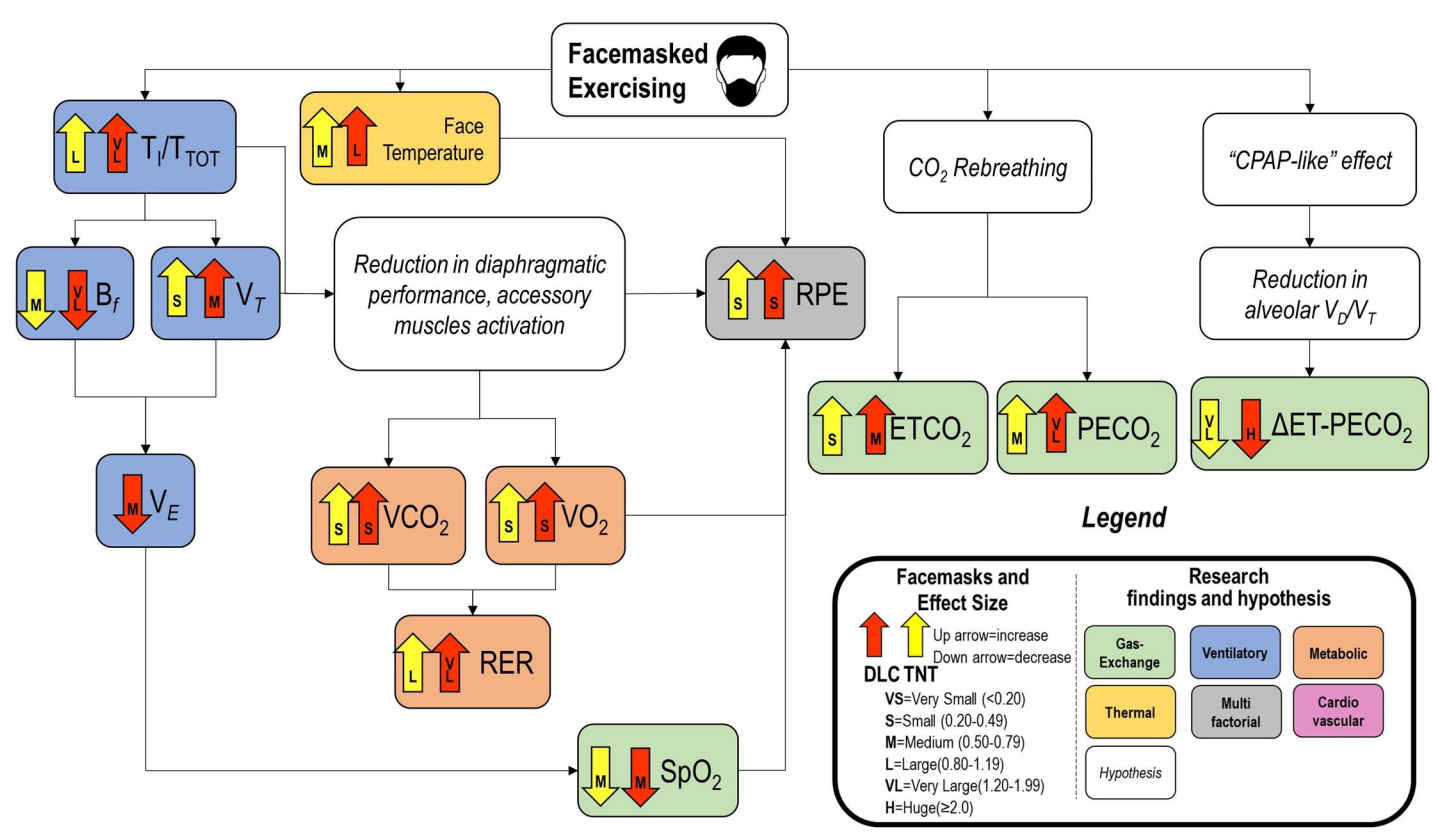

Moderate to high intensity

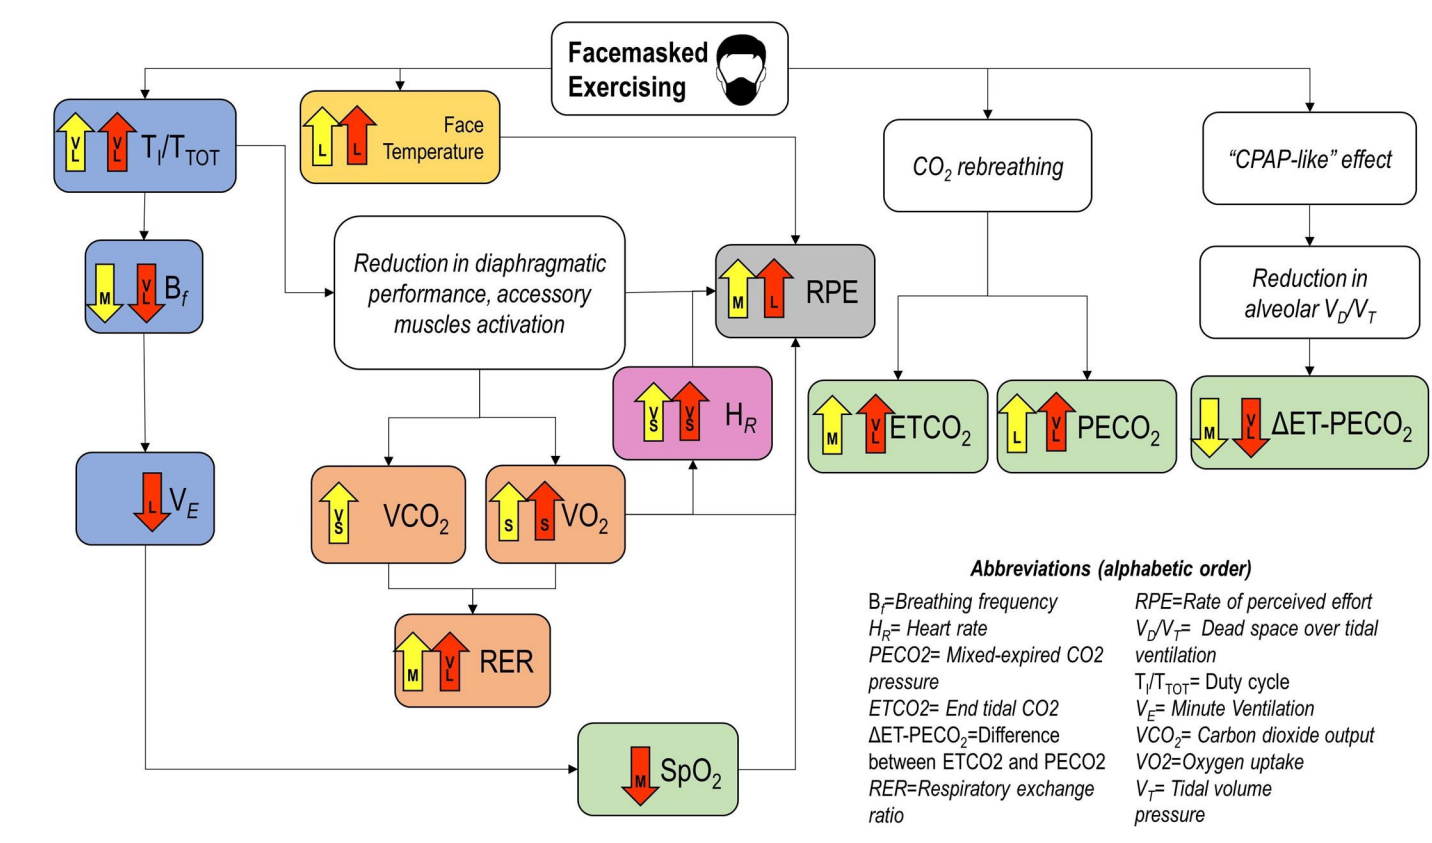

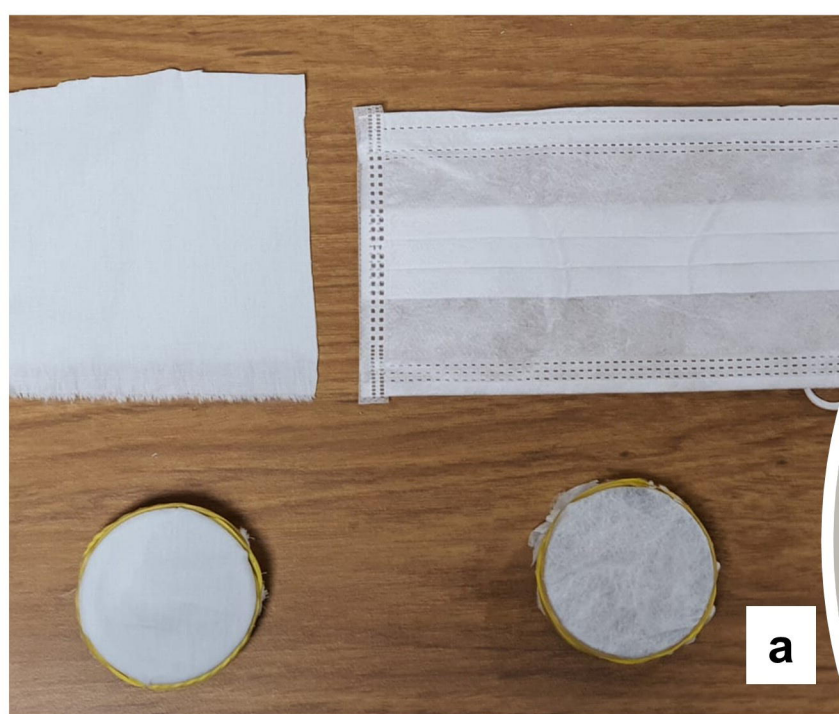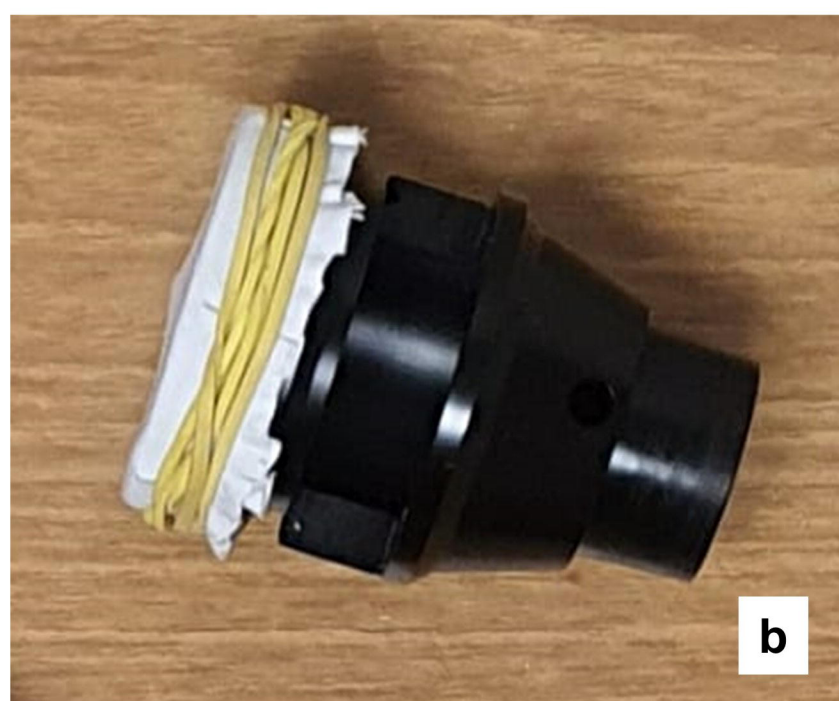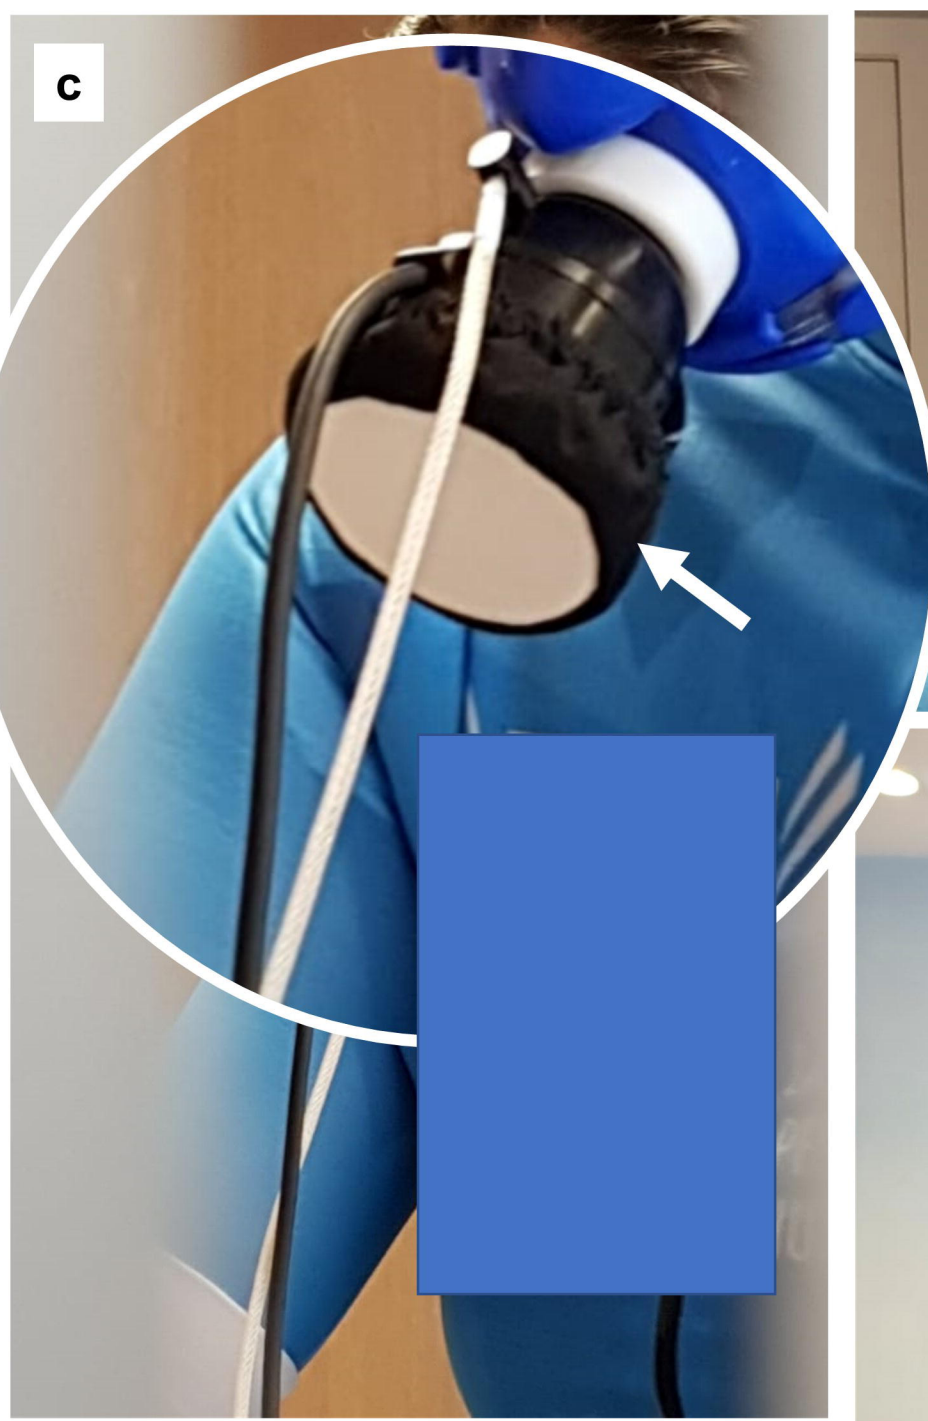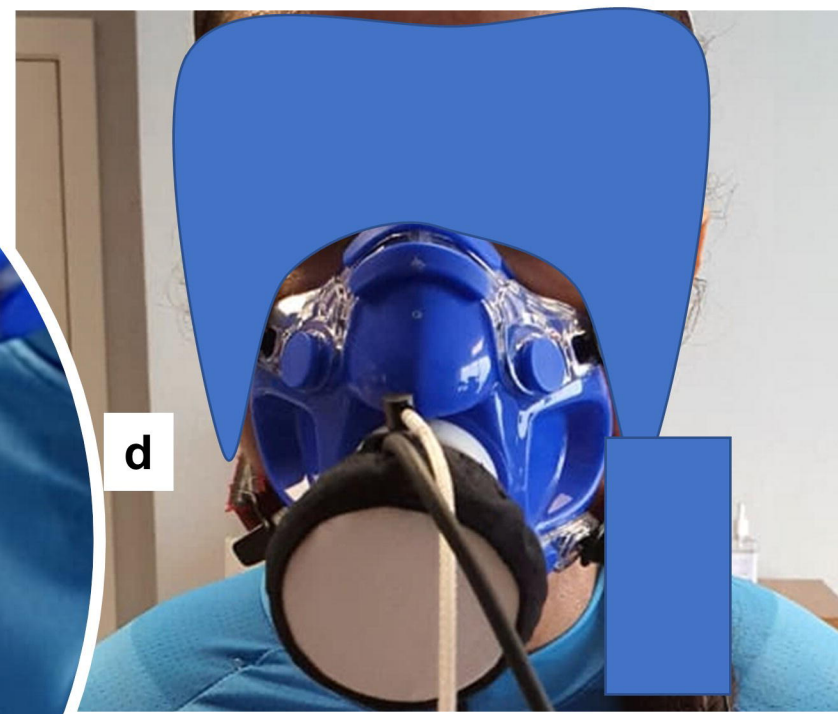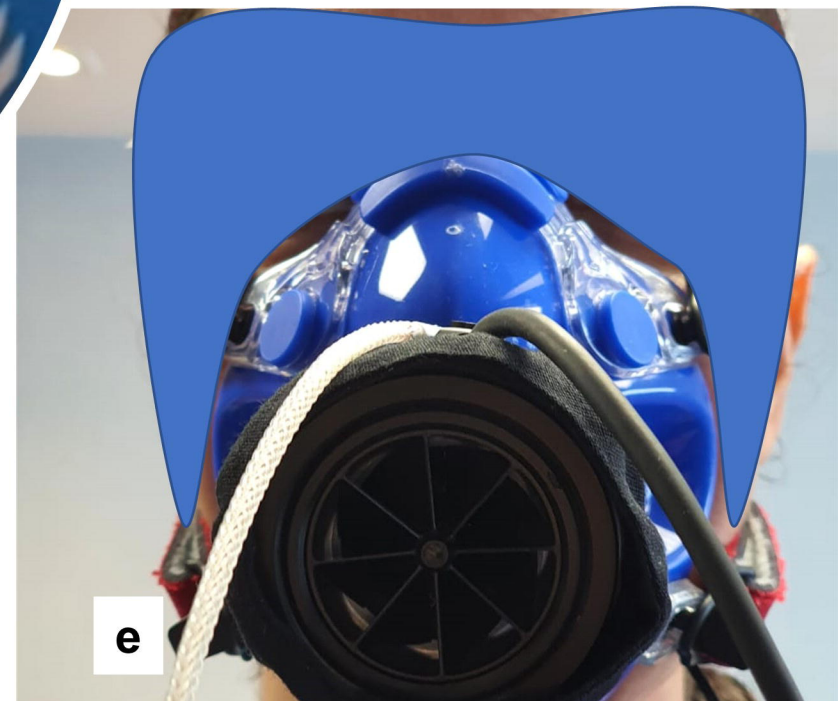

Source: https://medrxiv.org/content/medrxiv/early/2020/12/17/2020.12.11.20203224.full.pdf
